# Supplementary material for: Biocompatible fluorescent polymeric nanoparticles based on AIE dye and phospholipid monomers
Source: Royal Society of Chemistry journal article supplement (doi:10.1039/c4ra03092c), 2014-01-01
Supplement: c4ra03092c1.pdf [file c4ra03092c1.pdf]

## Supporting information

### Biocompatible fluorescent polymeric nanoparticles based on AIE dye and phospholipid monomer

Haiyin Li<sup>a</sup>, Xiqi Zhang<sup>\*b</sup>, Xiaoyong Zhang<sup>b</sup>, Bin Yang<sup>b</sup>, Yang Yang<sup>b</sup>, Zengfang Huang<sup>b, c</sup>, Yen  
Wei<sup>\*b</sup>

<sup>a</sup> College of Chemistry and Pharmaceutical Sciences, Qingdao Agriculture University, Qingdao,  
266109, P. R. China. <sup>b</sup> Department of Chemistry and the Tsinghua Center for Frontier Polymer  
Research, Tsinghua University, Beijing, 100084, P. R. China. <sup>c</sup> College of Chemistry and  
Biology, Zhongshan Institute, University of Electronic Science & Technology of China,  
Zhongshan, 528402, P. R. China.

[sychy Zhang@126.com](mailto:sychy Zhang@126.com); [weiyen@tsinghua.edu.cn](mailto:weiyen@tsinghua.edu.cn)

## 1. Experimental

### 1.1 Materials and measurements

11-Bromoundecanol, 4-bromobenzaldehyde and triethyl phosphite purchased from Alfa Aesar company and 9,10-bis(chloromethyl)anthracene purchased from TCI company were used as received. All other agents and solvents were purchased from commercial sources and used directly without further purification. Ultra-pure water was used in the experiments.

Gel permeation chromatography (GPC) analyses of polymers were performed using DMF as the eluent. The GPC system was a Shimadzu LC-20AD pump system comprising of an auto injector, a MZ-Gel SDplus 10.0 mm guard column (50×8.0 mm, 10<sup>2</sup> Å) followed by a MZ-Gel SDplus 5.0 µm bead-size columns (50-10<sup>6</sup> Å, linear) and a Shimadzu RID-10A refractive index detector. The system was calibrated with narrow molecular weight distribution polystyrene standards ranging from 200 to 10<sup>6</sup> g mol<sup>-1</sup>. <sup>1</sup>H NMR spectrum was measured on a Mercury-Plus 300 MHz spectrometer [d<sub>6</sub>-DMSO as solvent and tetramethylsilane (TMS) as the internal standard]. The FT-IR spectra were obtained in a transmission mode on a Shimadzu Spectrum 8400 spectrometer (Japan). Typically, 8 scans at a resolution of 1 cm<sup>-1</sup> were accumulated to obtain one spectrum. The X-ray photoelectron spectra (XPS) were performed on a VGESCALAB 220-IXL spectrometer using an Al Ka X-ray source (1486.6 eV). The energy scale was internally calibrated by referencing to the binding energy (Eb) of the C1s peak of a carbon contaminant at 284.6 eV. UV-Visible absorption spectra were recorded on UV/Vis/NIR 2600 spectrometer (Shimadzu, Japan) using quartz cuvettes of 1 cm path length. Fluorescence spectra were measured on an F-4600 spectrometer with a slit width of 3 nm for both excitation and emission. Transmission electron microscopy (TEM) images were recorded on a HT7700 microscope (Hitachi, Japan) operated at 100 kV, the TEM specimens were made by placing a drop of the nanoparticles suspension on a carbon-coated copper grid. The size distribution of **An-MTP** FPNs in phosphate buffer solution (PBS) were determined using a zeta Plus apparatus (ZetaPlus, Brookhaven Instruments, Holtsville, NY).

### 1.2 Synthesis of An

Tetraethyl anthracene-9,10-diylbis(methylene)diphosphonate and 4-(undec-10-enyloxy)-benzaldehyde were synthesized according to the previous literature.

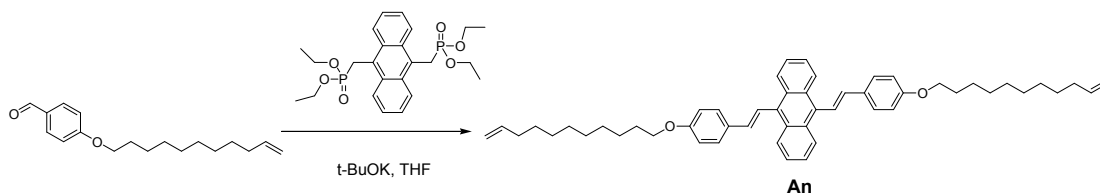

**Scheme S1** Synthetic route of **An**.

Tetraethyl anthracene-9,10-diylbis(methylene)diphosphonate (0.10 g, 0.21 mmol) and 4-(undec-10-enyloxy)benzaldehyde (0.137 g, 0.50 mmol) were dissolved in THF (20mL), and then t-BuOK (0.2 g) was added under nitrogen. The solution was stirred at room temperature overnight. After removing the solvent under reduced pressure, the residue was recrystallized with THF/EtOH to afford **An** (0.14 g, 93% yield). <sup>1</sup>H NMR (300 MHz, CDCl<sub>3</sub>) δ (ppm): 1.28-1.41 (m, 24H), 1.78-1.85 (m, 4H), 2.01-2.08 (m, 4H), 4.02 (t, 4H), 4.90-5.05 (m, 4H), 5.74-5.90 (m, 2H), 6.95 (d, 2H), 6.98 (d, 4H), 7.45 (q, 4H), 7.60 (d, 4H), 7.78 (d, 2H), 8.39 (q, 4H).

### 1.3 Preparation of **An-MTP FPNs**

To prepare **An-MTP** copolymers, a hydrophilic phospholipid monomer of MTP and a new AIE dye based dimer (**An**) were copolymerized at the existence of CTA *via* RAFT polymerization. The preparation of **An-MTP** FPNs was schematically shown in scheme 2. CTA (20 mg, 0.076 mmol), **An** (55 mg, 0.076 mmol), MTP (224 mg, 0.76 mmol), AIBN (5.0 mg) and DMF (5 mL) were introduced in schlenk tube and purged by nitrogen flow for 30 min. The above mixture was put into an oil bath maintained at 70 °C for 12 h. Then stopped the reaction of polymerization, and dialyzed against tap water for 24 h and ethanol for 6 h using 7000 Da Mw cutoff dialysis membranes. Finally, the solution in dialysis bag was carried out by freeze-drying to obtain **An-MTP FPNs**.

### 1.4 Cytotoxicity of **An-MTP FPNs**

Cell morphology was observed to examine the effects of **An-MTP FPNs** to A549 cells. Briefly, cells were seeded in 6-well microplates at a density of  $1 \times 10^5$  cells mL<sup>-1</sup> in 2 mL of respective media containing 10% fetal bovine serum (FBS). After cell attachment, plates were washed with PBS and cells were treated with complete cell culture medium, or different concentrations of **An-MTP FPNs** prepared in 10% FBS containing media for 24 h. Then all samples were washed with PBS three times to remove the uninternalized nanoparticles. The morphology of cells was observed by using an optical microscopy (Leica, Germany), the overall magnification was  $\times 100$ .

The cell viability of **An-MTP** FPNs on A549 cells was evaluated by cell counting kit-8 (CCK-8) assay. Briefly, cells were seeded in 96-well microplates at a density of  $5 \times 10^4$  cells  $\text{mL}^{-1}$  in 160  $\mu\text{L}$  of respective media containing 10% FBS. After 24 h of cell attachment, the cells were incubated with 10, 20, 40, 80, 120  $\mu\text{g mL}^{-1}$  **An-MTP** FPNs for 8 and 24 h. Then nanoparticles were removed and cells were washed with PBS three times. 10  $\mu\text{L}$  of CCK-8 dye and 100  $\mu\text{L}$  of DMEM cell culture medium were added to each well and incubated for 2 h at 37 °C. Plates were then analyzed with a microplate reader (VictorIII, Perkin-Elmer). Measurements of formazan dye absorbance were carried out at 450 nm, with the reference wavelength at 620 nm. The values were proportional to the number of live cells. The percent reduction of CCK-8 dye was compared to controls (cells not exposure to **An-MTP** FPNs), which represented 100% CCK-8 reduction. Three replicate wells were used per microplate, and the experiment was repeated three times. Cell survival was expressed as absorbance relative to that of untreated controls. Results are presented as mean  $\pm$  standard deviation (SD).

### **1.5 Confocal microscopic imaging of cells using An-MTP FPNs**

A549 cells were cultured in Dulbecco's modified eagle medium (DMEM) supplemented with 10% heat-inactivated FBS, 2 mM glutamine, 100 U  $\text{mL}^{-1}$  penicillin, and 100  $\mu\text{g mL}^{-1}$  of streptomycin. Cell culture was maintained at 37 °C in a humidified condition of 95% air and 5%  $\text{CO}_2$  in culture medium. Culture medium was changed every three days for maintaining the exponential growth of the cells. On the day prior to treatment, cells were seeded in a glass bottom dish with a density of  $1 \times 10^5$  cells per dish. On the day of treatment, the cells were incubated with **An-MTP** FPNs at a final concentration of 10  $\mu\text{g mL}^{-1}$  for 3 h at 37 °C. Afterward, the cells were washed three times with PBS to remove the **An-MTP** FPNs and then fixed with 4% paraformaldehyde for 10 min at room temperature. Cell images were taken with a confocal laser scanning microscope (CLSM) Zesis 710 3-channel (Zesis, Germany) with the excitation wavelength of 405 nm.

## **2. Results**

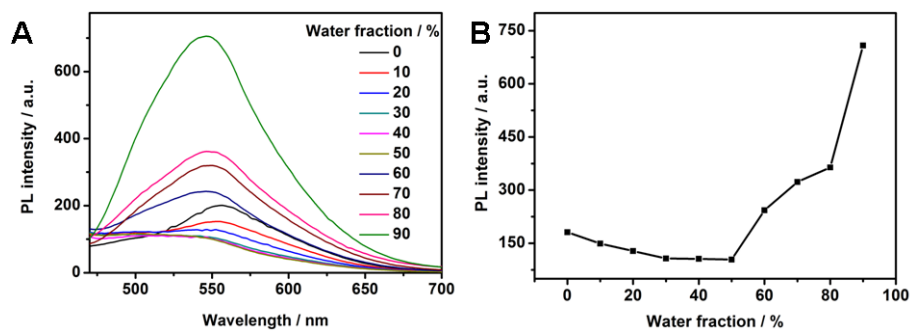

**Fig. S1** The AIE characteristic of **An** ( $\lambda_{\text{Ex}} = 405 \text{ nm}$ ): (A) PL spectra of **An** in THF–water mixtures with different water fractions; (B) the changes in PL peak intensity of **An** in different water fraction mixtures.

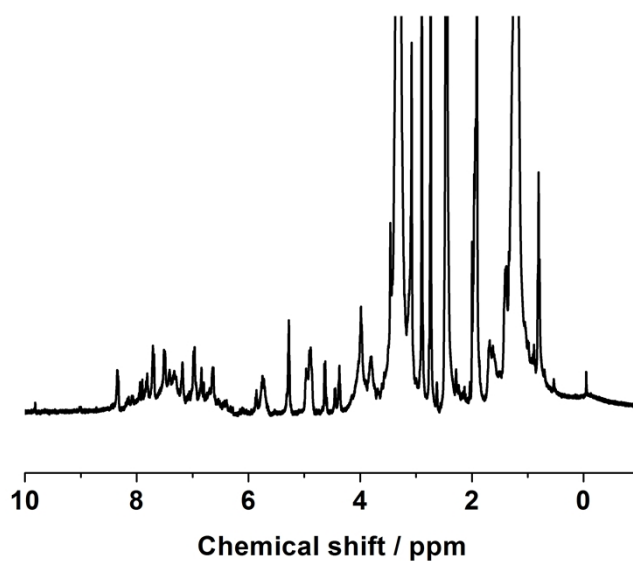

**Fig. S2**  $^1\text{H}$  NMR spectrum of **An-MTP** dissolved in  $\text{d}_6\text{-DMSO}$ .

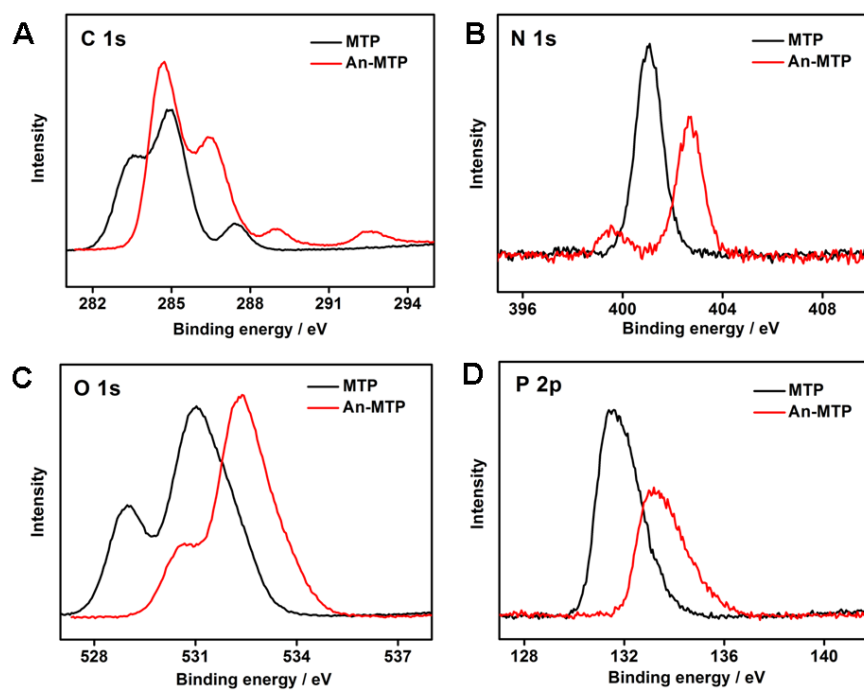

**Fig. S3** XPS spectra of MTP and **An-MTP** FPNs: (A) C 1s spectra; (B) N 1s spectra; (C) O 1s spectra; (D) P 2p spectra.
